# Supplementary material for: Intervention Adherence in REHAB‐HF: Predictors and Relationship With Physical Function, Quality of Life, and Clinical Events
Source: PubMed Central journal article supplement — J Am Heart Assoc. 2022 Jun 3;11(11):e024246. doi: 10.1161/JAHA.121.024246 (PMC9238741; doi:10.1161/jaha.121.024246), 2022-06-03
Supplement: JAH3-11-e024246-s001.pdf [file JAH3-11-e024246-s001.pdf]

## **SUPPLEMENTAL MATERIAL**

**Table S1: Missed Visits and Rehospitalization During Intervention Period**

|                                                              |           |
|--------------------------------------------------------------|-----------|
| Average Number of Missed Visits                              | 15.4±12.2 |
| Average Number of Missed Visits for Medical Reasons          | 4.7±6.8   |
| Patients with a Rehospitalization During Intervention Period | 58        |
| Number of Rehospitalizations During Intervention Period      | 97        |
| Average Days Rehospitalized During Intervention Period       | 3.3±7.6   |

Data presented as N or mean ± SD.
